# Supplementary material for: Measurement of vaporization enthalpy by isothermogravimetrical method and prediction of the polarity for 1-alkyl-3-methylimidazolium acetate {[Cnmim][OAc] (n = 4, 6)} ionic liquids
Source: Royal Society of Chemistry journal article supplement (doi:10.1039/c5ra12626f), 2015-01-01
Supplement: c5ra12626f1.pdf [file c5ra12626f1.pdf]

## Supporting Information:

### Measurement of vaporization enthalpy by isothermogravimetric method and prediction of the polarity for 1-alkyl-3-methylimidazolium acetate {[C<sub>n</sub>mim][OAc] (n = 4, 6)} ionic liquids

Jie Wei, Xiaoxue Bu, Wei Guan\*, Nannan Xing, Dawei Fang and Yang Wu\*

#### Section A <sup>1</sup>H NMR spectra

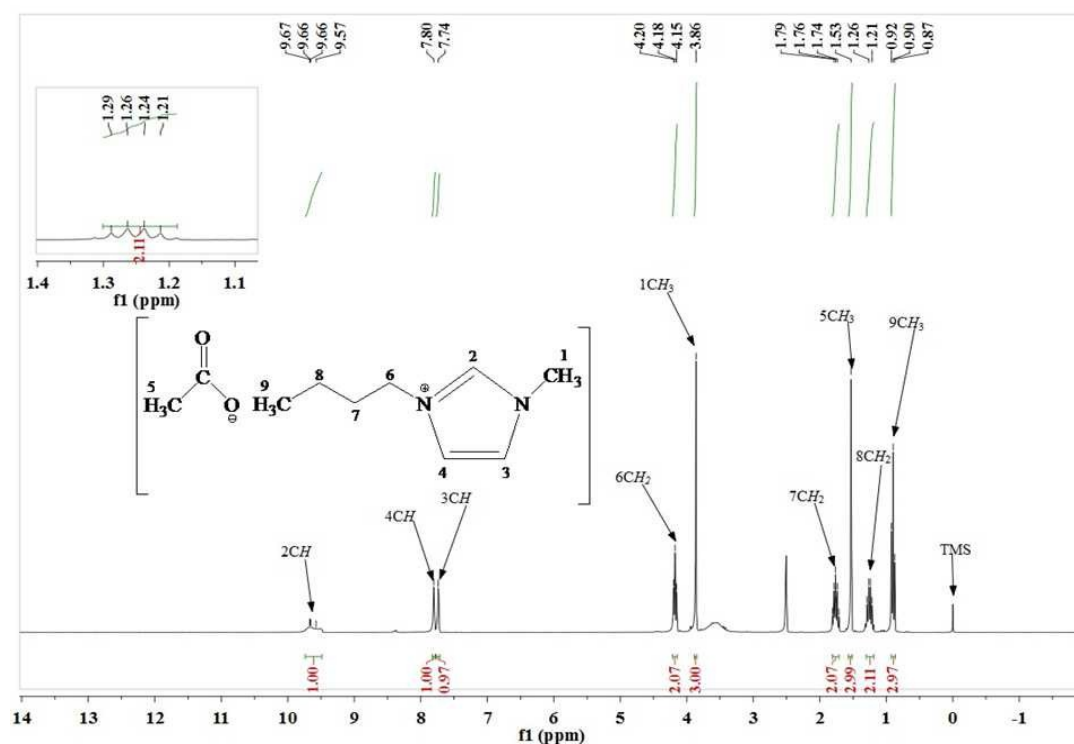

Fig. S1 <sup>1</sup>H NMR spectrum  $\delta_{\text{H}}$  (300 MHz, DMSO) of [C<sub>4</sub>mim][OAc]

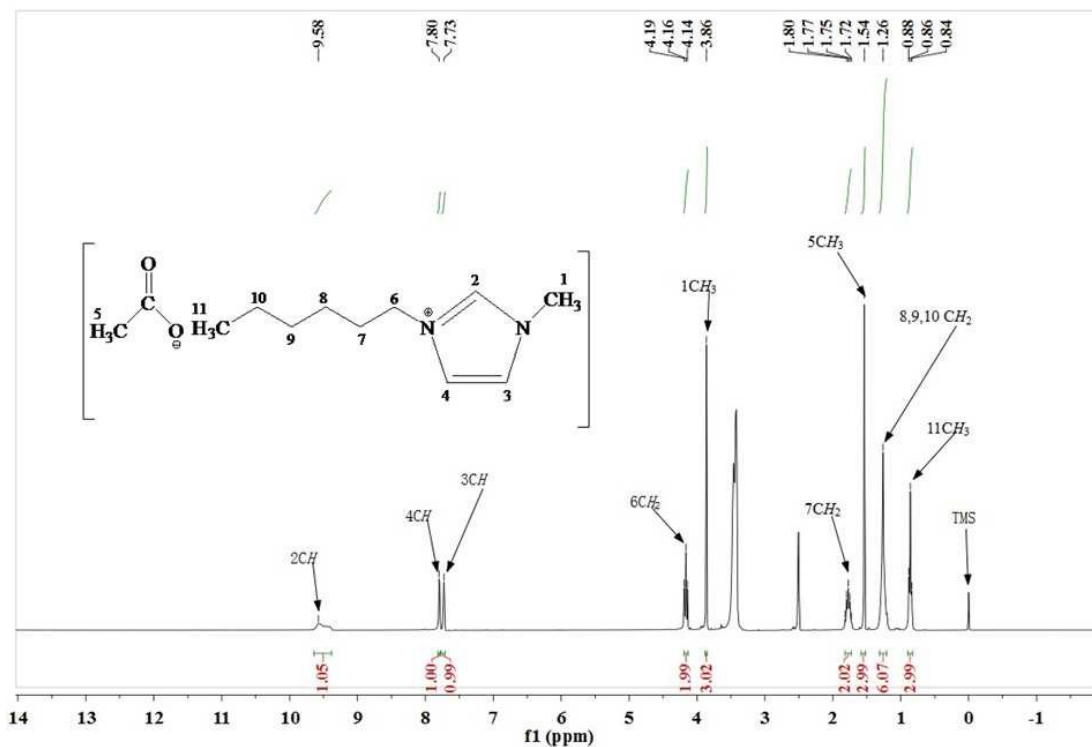

Fig. S2  $^1\text{H}$  NMR spectrum  $\delta_{\text{H}}$  (300 MHz, DMSO) of  $[\text{C}_6\text{mim}][\text{OAc}]$

## Section B Thermal analysis

Calorimetric data were obtained with a differential scanning calorimeter DSC (Mettler-Toledo Co., Switzerland). The temperature range was  $-100$ - $100$   $^{\circ}\text{C}$  with heating rate of  $10$   $^{\circ}\text{C}\cdot\text{min}^{-1}$ . Then samples were incubated at  $-100$   $^{\circ}\text{C}$  for 5 min and were then heated to  $100$   $^{\circ}\text{C}$ .

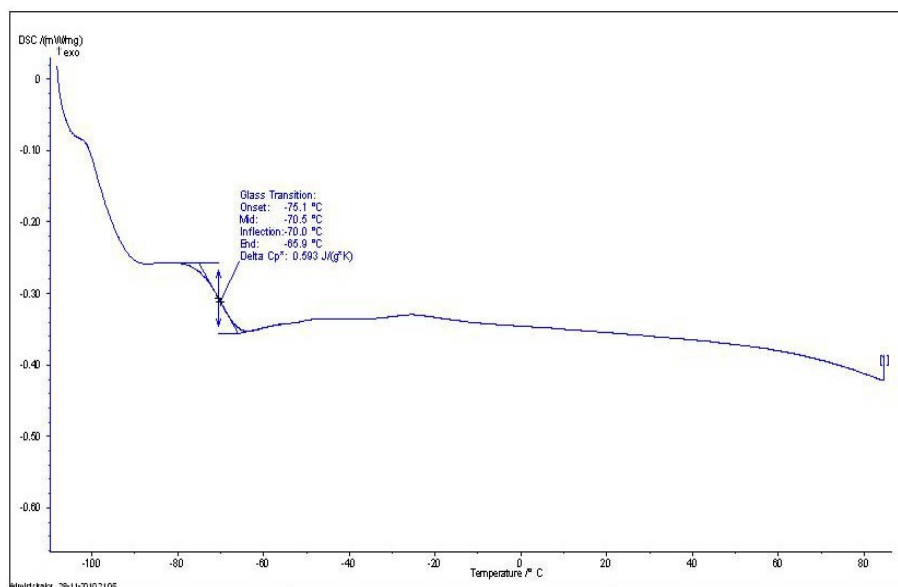

Fig. S3 DSC thermogram of  $[\text{C}_4\text{mim}][\text{OAc}]$

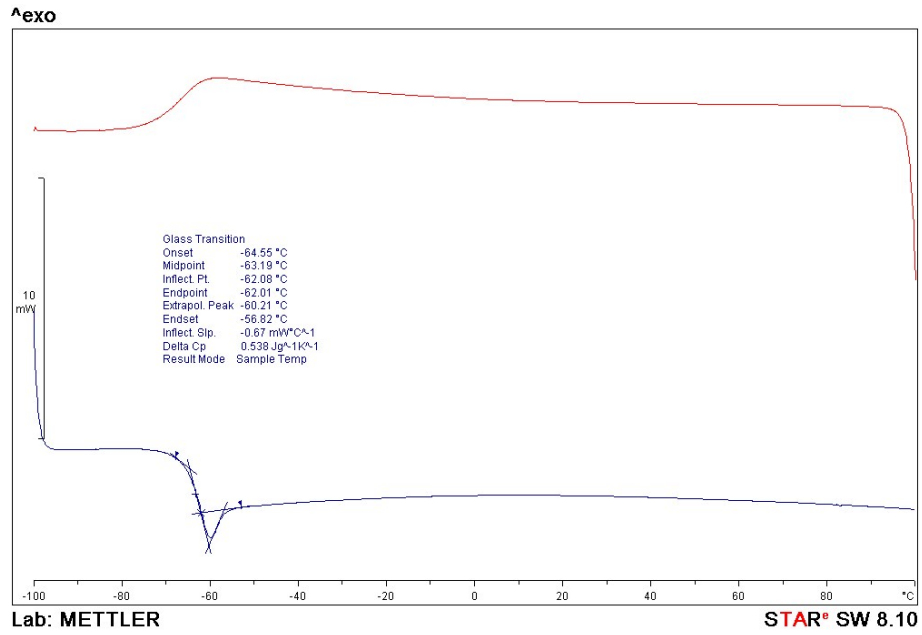

Fig. S4 DSC thermogram of [C<sub>6</sub>mim][OAc]

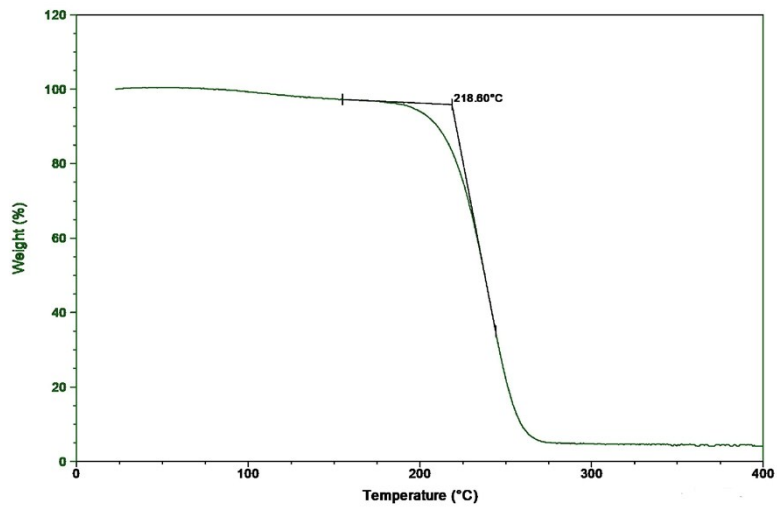

Fig. S5 TG plot of [C<sub>4</sub>mim][OAc]

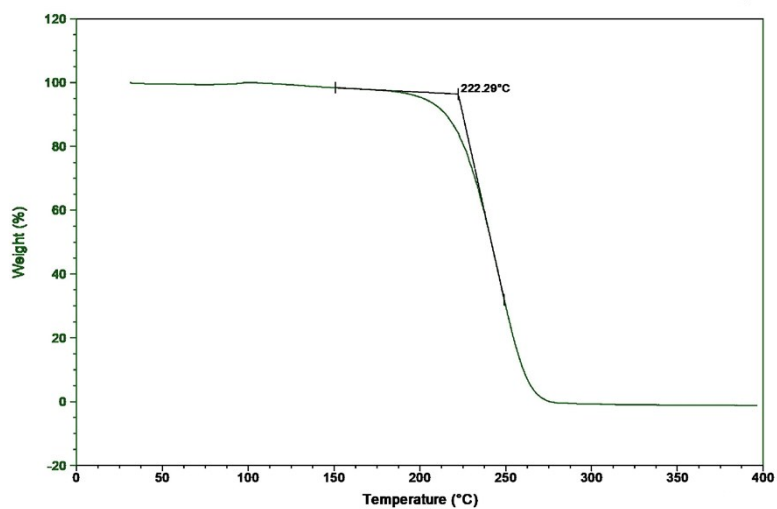

**Fig. S6** TG plot of [C<sub>6</sub>mim][OAc]

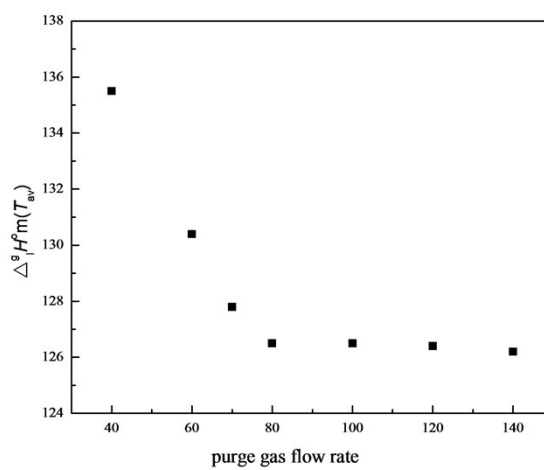

**Fig. S7** The influence of purge gas rate on the evaporation enthalpy: Nitrogen flow of 40, 50, 60, 70, 80, 100, 120 and 140 mL·min<sup>-1</sup> of [C<sub>4</sub>mim][OAc] at the same temperature and hold period in the experiments.

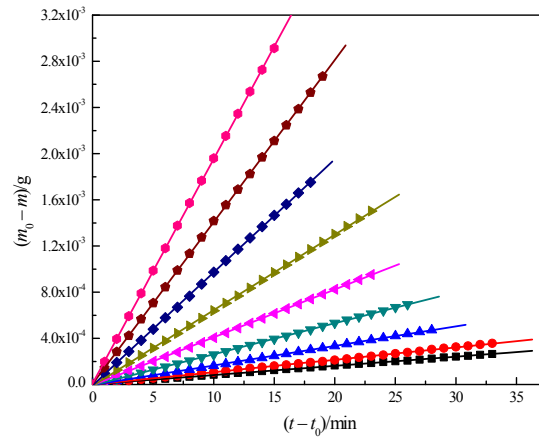

**Fig.S8** Plot of  $(m_0 - m)$  vs.  $(t - t_0)$  for  $[C_4mim][OAc]$  at the temperature rang from 408 K to 448 K.

- 408K:  $m_0 - m = -1.924 \times 10^{-6} + 7.982 \times 10^{-6}(t - t_0)$ ,  $r = 0.9998$ ,  $s = 1.70 \times 10^{-6}$ ;
- 413K:  $m_0 - m = -7.048 \times 10^{-7} + 1.074 \times 10^{-5}(t - t_0)$ ,  $r = 0.9998$ ,  $s = 2.00 \times 10^{-6}$ ;
- ▲418K:  $m_0 - m = -4.465 \times 10^{-6} + 1.694 \times 10^{-5}(t - t_0)$ ,  $r = 0.9999$ ,  $s = 2.19 \times 10^{-6}$ ;
- ▼423K:  $m_0 - m = -6.541 \times 10^{-6} + 2.687 \times 10^{-5}(t - t_0)$ ,  $r = 0.9999$ ,  $s = 2.66 \times 10^{-6}$ ;
- ◆428K:  $m_0 - m = -6.589 \times 10^{-6} + 4.147 \times 10^{-5}(t - t_0)$ ,  $r = 0.9999$ ,  $s = 2.88 \times 10^{-6}$ ;
- ▶433K:  $m_0 - m = -1.154 \times 10^{-5} + 6.549 \times 10^{-5}(t - t_0)$ ,  $r = 0.9999$ ,  $s = 5.14 \times 10^{-6}$ ;
- ◆438K:  $m_0 - m = -7.777 \times 10^{-6} + 9.794 \times 10^{-5}(t - t_0)$ ,  $r = 0.9999$ ,  $s = 5.08 \times 10^{-6}$ ;
- ◆443K:  $m_0 - m = 3.551 \times 10^{-6} + 1.403 \times 10^{-4}(t - t_0)$ ,  $r = 0.9999$ ,  $s = 4.38 \times 10^{-6}$ ;
- 448K:  $m_0 - m = 7.937 \times 10^{-6} + 1.946 \times 10^{-4}(t - t_0)$ ,  $r = 0.9999$ ,  $s = 6.50 \times 10^{-6}$ .

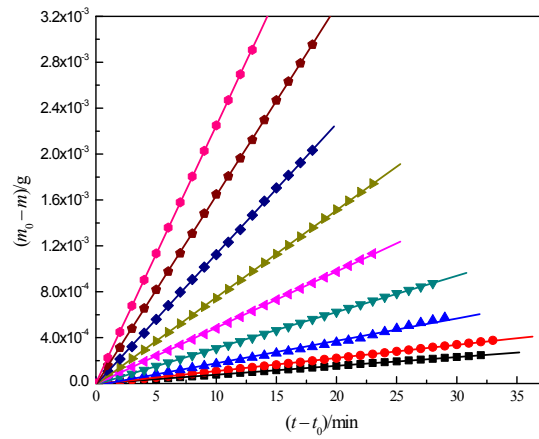

**Fig.S9** Plot of  $(m_0 - m)$  vs.  $(t - t_0)$  for  $[C_6mim][OAc]$  at the temperature rang from 408 K to 448 K.

408K:  $m_0 - m = -4.853 \times 10^{-7} + 7.707 \times 10^{-6}(t - t_0)$ ,  $r = 0.9999$ ,  $s = 3.77 \times 10^{-7}$ ;

413K:  $m_0 - m = -5.987 \times 10^{-6} + 1.143 \times 10^{-5}(t - t_0)$ ,  $r = 0.9998$ ,  $s = 2.51 \times 10^{-6}$ ;

418K:  $m_0 - m = -1.813 \times 10^{-5} + 1.950 \times 10^{-5}(t - t_0)$ ,  $r = 0.9992$ ,  $s = 1.31 \times 10^{-5}$ ;

423K:  $m_0 - m = -8.098 \times 10^{-6} + 3.158 \times 10^{-5}(t - t_0)$ ,  $r = 0.9999$ ,  $s = 2.73 \times 10^{-6}$ ;

428K:  $m_0 - m = -5.263 \times 10^{-6} + 4.907 \times 10^{-5}(t - t_0)$ ,  $r = 0.9999$ ,  $s = 3.49 \times 10^{-6}$ ;

433K:  $m_0 - m = -1.124 \times 10^{-5} + 7.606 \times 10^{-5}(t - t_0)$ ,  $r = 0.9999$ ,  $s = 4.25 \times 10^{-6}$ ;

438K:  $m_0 - m = -9.766 \times 10^{-6} + 1.137 \times 10^{-4}(t - t_0)$ ,  $r = 0.9999$ ,  $s = 7.44 \times 10^{-6}$ ;

443K:  $m_0 - m = -1.009 \times 10^{-5} + 1.648 \times 10^{-4}(t - t_0)$ ,  $r = 0.9999$ ,  $s = 6.12 \times 10^{-6}$ ;

448K:  $m_0 - m = 4.534 \times 10^{-6} + 2.242 \times 10^{-4}(t - t_0)$ ,  $r = 0.9999$ ,  $s = 5.96 \times 10^{-6}$ .

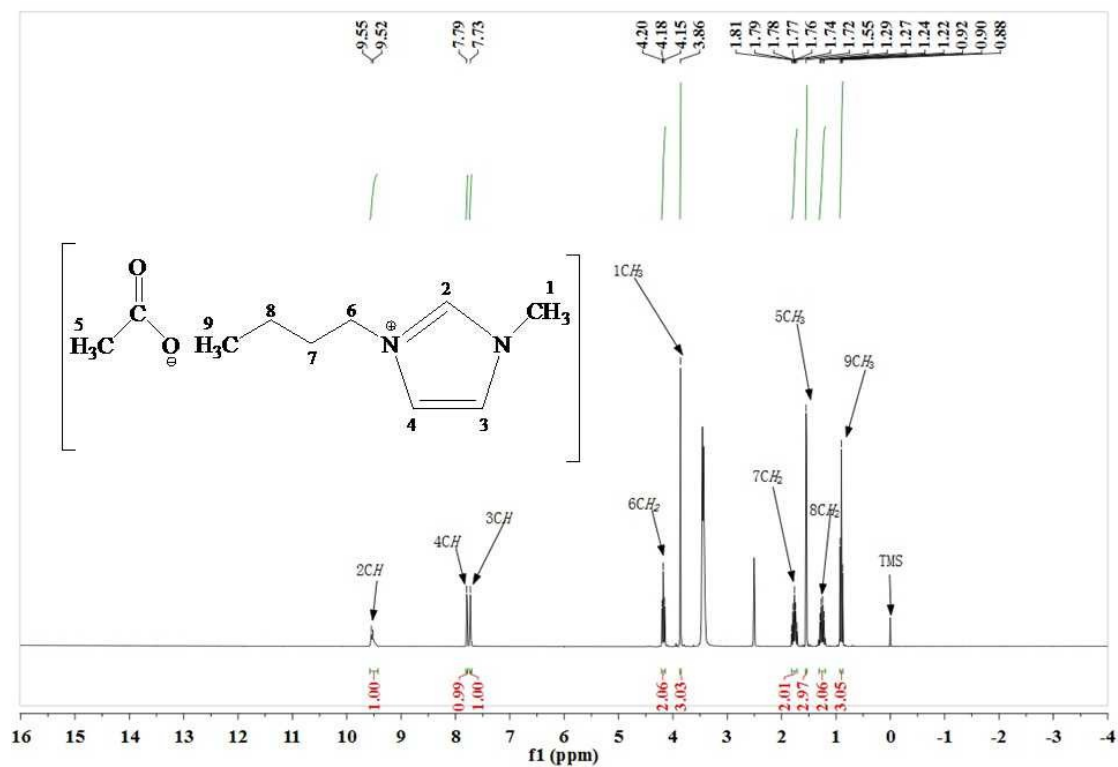

Fig. S10 The <sup>1</sup>H NMR spectrum  $\delta_H$  (300 MHz, DMSO) of residual [C<sub>4</sub>mim][OAc] in the crucible

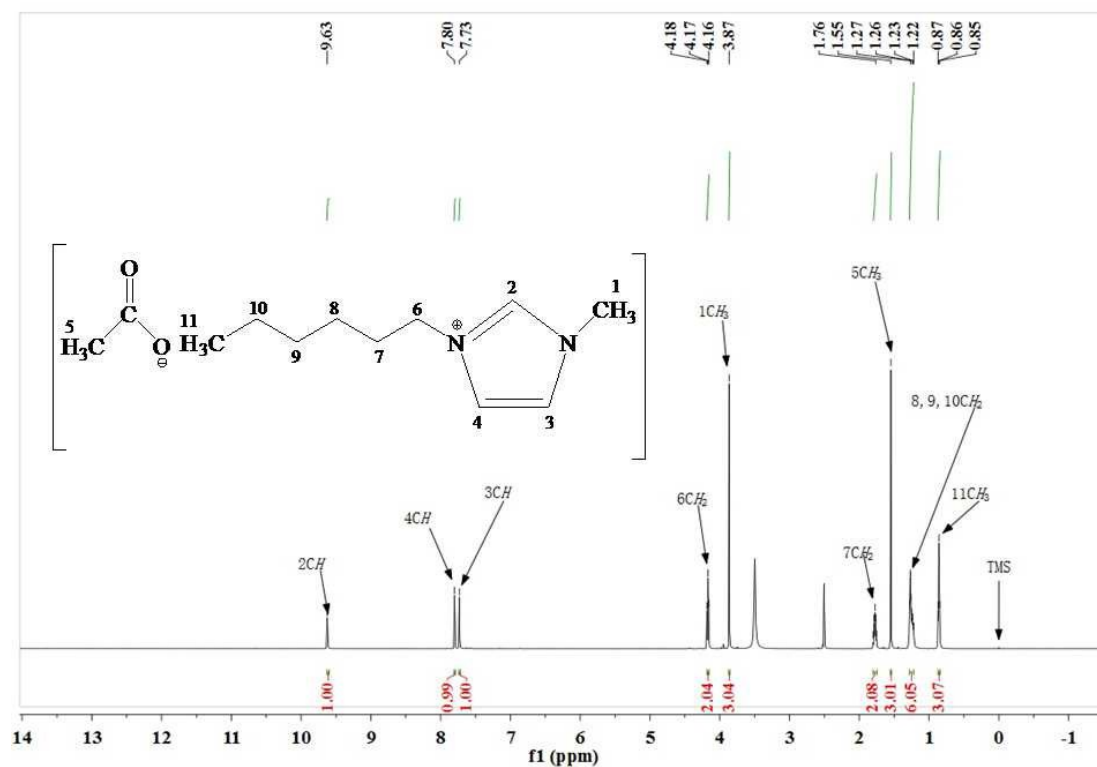

Fig. S11 The <sup>1</sup>H NMR spectrum  $\delta_H$  (300 MHz, DMSO) of residual [C<sub>6</sub>mim][OAc] in the crucible

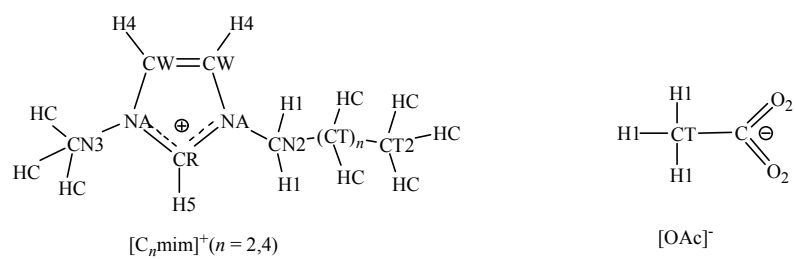

**Fig. S12** Schematic structure and atomic type notations of the 1-alkyl-3-methylimidazolium cation ( $[C_n\text{mim}]^+$ ) ( $n = 4, 6$ ), and acetic acid anion ( $[\text{OAc}]^-$ ) in the AMBER force field.



**Table S1** The source and purity of the materials.

| Chemical name                      | Source                    | Purification method     | Mass fraction purity |
|------------------------------------|---------------------------|-------------------------|----------------------|
| <i>N</i> -methylimidazole          | ACROS                     | Further purification    | ≥ 0.998              |
| Acetic acid                        | Shanghai Reagent Co. Ltd. | Further purification    | ≥ 0.990              |
| 1-bromobutane                      | Shanghai Reagent Co. Ltd. | Further purification    | > 0.985              |
| 1-chlorohexane                     | Shanghai Reagent Co. Ltd. | Further purification    | > 0.985              |
| Ethyl acetate                      | Shanghai Reagent Co. Ltd. | No further purification | > 0.985              |
| Acetonitrile                       | Shanghai Reagent Co. Ltd. | No further purification | > 0.995              |
| Anion-exchange resin<br>(type 717) | Shanghai Reagent Co. Ltd. | No further purification | granularity: > 0.950 |

**Table S2** The values of  $-dm/dt$  and  $\ln[T^{1/2} \cdot (-dm/dt)]$  for  $[C_n\text{mim}][\text{OAc}]$  ( $n = 4, 6$ ) from 408 K to 448 K.

| $T^{[a]}/\text{K}$        | $T^{-1}/\text{K}^{-1}$ | $10^5(-dm/dt)/\text{g} \cdot \text{min}^{-1}$ | $\ln[T^{1/2} \cdot (-dm/dt)]$ |
|---------------------------|------------------------|-----------------------------------------------|-------------------------------|
| [C <sub>4</sub> mim][OAc] |                        |                                               |                               |
| 408                       | 0.002451               | 0.7982                                        | -8.733                        |
| 413                       | 0.002421               | 1.074                                         | -8.429                        |
| 418                       | 0.002392               | 1.694                                         | -7.968                        |
| 423                       | 0.002364               | 2.687                                         | -7.501                        |
| 428                       | 0.002336               | 4.147                                         | -7.061                        |
| 433                       | 0.002309               | 6.549                                         | -6.598                        |
| 438                       | 0.002283               | 9.794                                         | -6.190                        |
| 443                       | 0.002257               | 14.03                                         | -5.824                        |
| 448                       | 0.002232               | 19.46                                         | -5.492                        |
| [C <sub>6</sub> mim][OAc] |                        |                                               |                               |
| 408                       | 0.002451               | 0.7707                                        | -8.768                        |
| 413                       | 0.002421               | 1.143                                         | -8.368                        |
| 418                       | 0.002392               | 1.950                                         | -7.827                        |
| 423                       | 0.002364               | 3.158                                         | -7.339                        |
| 428                       | 0.002336               | 4.907                                         | -6.893                        |
| 433                       | 0.002309               | 7.606                                         | -6.449                        |
| 438                       | 0.002283               | 11.37                                         | -6.041                        |
| 443                       | 0.002257               | 16.48                                         | -5.664                        |
| 448                       | 0.002232               | 22.42                                         | -5.351                        |

<sup>[a]</sup>: the standard uncertainty (0.68 level of confidence):  $u(T) = 0.02$  K for temperature.

The details of the new estimation values of  $\Delta^{\xi_1}C_{p,m}^{\circ}$  based on statistical thermodynamics and some auxiliary experimental data.

Heat capacities in the liquid and gaseous state could be considered as the sum of translational, rotational, vibrational, and conformational contributions according to equations (1) and (2).

$$C_{p,m}^{\circ}(g) = C_{v,m}^{\circ}(\text{transl, g}) + C_{v,m}^{\circ}(\text{rot, g}) + C_{v,m}^{\circ}(\text{vib, g}) + C_{v,m}^{\circ}(\text{conf, g}) + (C_{p,m}^{\circ} - C_{v,m}^{\circ})_g \quad (1)$$

$$C_{p,m}^{\circ}(l) = C_{v,m}^{\circ}(\text{transl, l}) + C_{v,m}^{\circ}(\text{rot, l}) + C_{v,m}^{\circ}(\text{vib, l}) + C_{v,m}^{\circ}(\text{conf, l}) + (C_{p,m}^{\circ} - C_{v,m}^{\circ})_l \quad (2)$$

where  $(C_{p,m}^{\circ} - C_{v,m}^{\circ})_g$  and  $(C_{p,m}^{\circ} - C_{v,m}^{\circ})_l$  are the appropriate differences between isobaric and isochoric heat capacities. With assumption that vibrational contributions, as well as that equilibrium of conformers are not significantly different in the gas and in the liquid phase, we have combined equations (1) and (2) and suggested for the heat capacity difference between gas and liquid the following simplified expression:

$$\Delta^{\xi_1}C_{p,m}^{\circ} = C_{v,m}^{\circ}(\text{transl, g}) + C_{v,m}^{\circ}(\text{rot, g}) + (C_{p,m}^{\circ} - C_{v,m}^{\circ})_g - C_{v,m}^{\circ}(\text{transl, l}) - C_{v,m}^{\circ}(\text{rot, l}) - (C_{p,m}^{\circ} - C_{v,m}^{\circ})_l \quad (3)$$

From the common statistical thermodynamics knowledge, a sum of contributions of the free rotation of a molecule and free translational motion of a molecule into the heat capacity in the ideal gas state is equal to  $3R$ . According to the oscillation theory<sup>1</sup> in the condensed state no free rotation of the molecule or linear motion of the molecules is possible. So the translational motion is converted into the vibrations with low frequencies and the rotation is converted into the librations or hindered rotation. The contribution of vibrations (librations) at low frequencies into the heat capacity is  $R$  for each degree of freedom ( $6R$  for all converted rotational and translational contributions). In the case of hindered rotation this contribution will get within  $(1/2)R$  to  $R$  for each degree of hindered rotation freedom. In the case of highly viscous liquids with quasi-crystal structure the value of  $3R$  (vibrations) is more possible than  $(3/2)R$  (free motion). With the  $(C_{p,m}^{\circ} - C_{v,m}^{\circ})_g = R$  for ideal gas systems equation (3) was simplified as follows:

$$\Delta^{\xi_1}C_{p,m}^{\circ} = (3/2)R + (3/2)R + R - 3R - 3R - (C_{p,m}^{\circ} - C_{v,m}^{\circ})_l = -2R - (C_{p,m}^{\circ} - C_{v,m}^{\circ})_l \quad (4)$$

It is apparent now that the contribution  $(C_{p,m}^{\circ} - C_{v,m}^{\circ})_l$  in equation (4) is the main part of the heat capacity difference,  $\Delta^{\xi_1}C_{p,m}^{\circ}$ , vitally important for the proper temperature adjustments of vaporization enthalpies as discussed above. Fortunately, the contribution  $(C_{p,m}^{\circ} - C_{v,m}^{\circ})_l$  could be easily calculated from the volumetric properties<sup>2</sup>:

$$(C_{p,m}^{\circ} - C_{v,m}^{\circ})_l = (\alpha_p^2/\kappa_T) V_m T \quad (5)$$

where  $\alpha_p$  is the thermal expansion coefficient,  $K^{-1}$ ;  $\kappa_T$  is the isothermal compressibility,  $Pa^{-1}$ , and  $V_m$  is the molar volume,  $m^3 \cdot mol^{-1}$ . The molar volume, as well as thermal expansion coefficient is usually derived from the liquid density temperature dependence measurements. The compressibility values can be calculated from the pressure dependence of density in the isothermal conditions. But more often the  $\kappa_T$  value is calculated from the speed of sound  $W(T, p)$ <sup>3</sup>:

$$\kappa_T = (1/\rho) (1/W^2 + T\alpha_p^2 M/C_{p,m}^{\circ}) \quad (6)$$

where  $\rho$  is the density of the IL,  $kg \cdot m^{-3}$ , and  $M$  is the molar mass,  $kg \cdot mol^{-1}$ . Thus, equation (4) developed in this study in combination with equations (5) and (6) could help to assess the value of the heat capacity difference,  $\Delta^{\xi} C_{p,m}^{\circ}$ , provided that volumetric data ( $\rho$ ,  $\alpha_p$ ,  $\kappa_T$ ) for the IL of interest is available in the literature or estimated with any empirical rules available, e.g. for  $W(T, p)$  and  $C_{p,m}^{\circ}(l)$ . The speed of sound in the IL  $W(T, p)$  could be derived with the help of Auerbach relation<sup>4</sup>:

$$W \text{ (m/s)} = [\sigma/(6.3 \times 10^{-10} \rho)]^{2/3} \quad (7)$$

where values for density  $\rho$ ,  $kg \cdot m^{-3}$ , and surface tension  $\sigma$ ,  $J \cdot m^{-2}$ , were available from the literature<sup>5</sup>. The heat capacity of the liquid phase  $C_{p,m}^{\circ}(l)$  used in equation (6) for calculation of the compressibility  $\kappa_T$  could be estimated using an empirical equation<sup>6</sup>:

$$C_{p,m}^{\circ} = 8.6 + 1.915 V_m \quad (8)$$

where  $V_m$  is molar volume,  $cm^3 \cdot mol^{-1}$ . According to above equations,  $\Delta^{\xi} C_{p,m}^{\circ}$  of the three ILs were calculated. The data needed in the calculation<sup>5</sup> and the values of  $\Delta^{\xi} C_{p,m}^{\circ}$  are listed in Table .

1 E.A. Moelwyn-Hughes, Physical Chemistry. New York, London, Paris: Pergamon Press, 1954.

2 Y.U. Paulechka, D.H. Zaitsau, G.J. Kabo. *J. Mol. Liq.*, 2004, **115**, 105–111.

3 D.H. Zaitsau, K. Fumino, V.N. Emel'yanenko, A.V. Yermalaeu, R. Ludwig, S.P. Verevkin. *ChemPhysChem*, 2012, **13**, 1868–1876.

4 R. Auerbach, *Experientia*, 1948, **4**, 473

5 X.X. Ma, J. Wei, Q.B. Zhang, F. Tian, Y.Y. Feng, W. Guan, *Ind. Eng. Chem. Res.*, 2013, **52**, 9490–9496.

6 Y.U. Paulechka, A.G. Kabo, A.V. Blokhin, G.J. Kabo, M.P. Shevelyova, *J. Phys. Chem. Ref. Data*, 2010, **39** 033108

**Table** The data needed in the calculation of  $\Delta^{\xi} C_{p,m}^{\circ} / J \cdot K^{-1} \cdot mol^{-1}$  for  $[C_n \text{mim}][\text{OAc}]$  ( $n = 4, 6$ ) and the result at  $T = 298 \text{ K}$ .

| ILs                  | $M / kg \cdot mol^{-1}$      | $\rho / kg \cdot m^{-3}$ | $\sigma / J \cdot m^{-2}$                            | $10^4 V_m / m^3 \cdot mol^{-1}$ | $10^4 \alpha_p / K^{-1}$ |
|----------------------|------------------------------|--------------------------|------------------------------------------------------|---------------------------------|--------------------------|
| [C <sub>4</sub> mim] | 0.198264                     | 1047.4                   | 0.0354                                               | 1.89292                         | 5.84                     |
| [OAc]                | $10^{10} \kappa_T / Pa^{-1}$ | $W / m \cdot s^{-1}$     | $C_{p,m}^{\circ}(l) / J \cdot K^{-1} \cdot mol^{-1}$ | $\Delta^{\xi} C_{p,m}^{\circ}$  |                          |

|                      |                              |                          |                                                |                                  |                          |
|----------------------|------------------------------|--------------------------|------------------------------------------------|----------------------------------|--------------------------|
|                      | 1.32068                      | 1422.44                  | (Paulechka's)                                  | $/J \cdot K^{-1} \cdot mol^{-1}$ |                          |
|                      | $M / kg \cdot mol^{-1}$      | $\rho / kg \cdot m^{-3}$ | 354.77                                         | -53.4                            |                          |
|                      | 0.226316                     | 1017.0                   | $\sigma / J \cdot m^{-2}$                      | $10^4 V_m / m^3 \cdot mol^{-1}$  | $10^4 \alpha_p / K^{-1}$ |
| [C <sub>6</sub> mim] |                              |                          | 0.0331                                         | 2.22533                          | 5.99                     |
| [OAc]                | $10^{10} \kappa_T / Pa^{-1}$ | $W / m \cdot s^{-1}$     | $C_{p,m}^o(l) / J \cdot K^{-1} \cdot mol^{-1}$ | $\Delta_g C_{p,m}^o$             |                          |
|                      |                              |                          | (Paulechka's)                                  | $/J \cdot K^{-1} \cdot mol^{-1}$ |                          |
|                      | 1.1499                       | 1387.11                  | 417.23                                         | -58.7                            |                          |

**Table S3** RESP charge parameters for [C<sub>n</sub>mim]<sup>+</sup> (*n* = 4, 6) and [OAc]<sup>-</sup> ILs used in this work.

|                                   | Atom type          | Number | charge    | Atom type | Number | charge    |        |
|-----------------------------------|--------------------|--------|-----------|-----------|--------|-----------|--------|
| [C <sub>4</sub> mim] <sup>+</sup> | NA                 | 150    | 0.1216    | H5        | 175    | 0.2251    |        |
|                                   | CN3                | 16     | -0.1475   | H4        | 173    | 0.2192    |        |
|                                   | HC                 | 227    | 0.1217    | H4        | 190    | 0.2501    |        |
|                                   | CN2                | 351    | -0.1322   | CT        | 25     | 0.1099    |        |
|                                   | H1                 | 512    | 0.0916    | HC        | 185    | -0.0135   |        |
|                                   | NA                 | 187    | 0.0677    | CT        | 28     | 0.1321    |        |
|                                   | CR                 | 174    | 0.0075    | HC        | 201    | -0.0052   |        |
|                                   | CW                 | 172    | -0.1232   | CT2       | 21     | -0.2353   |        |
|                                   | CW                 | 204    | -0.2058   | HC        | 168    | 0.0666    |        |
| [C <sub>6</sub> mim] <sup>+</sup> | NA                 | 150    | 0.046955  | H4        | 190    | 0.245614  |        |
|                                   | CN3                | 16     | -0.166878 | CT        | 25     | 0.179550  |        |
|                                   | HC                 | 227    | 0.127579  | HC        | 185    | -0.028410 |        |
|                                   | CN2                | 351    | -0.085534 | CT        | 28     | -0.006660 |        |
|                                   | H1                 | 512    | 0.087393  | HC        | 201    | 0.003158  |        |
|                                   | NA                 | 187    | 0.052111  | CT        | 33     | -0.046146 |        |
|                                   | CR                 | 174    | 0.045611  | HC        | 239    | 0.010154  |        |
|                                   | CW                 | 172    | -0.106346 | CT        | 35     | 0.166622  |        |
|                                   | CW                 | 204    | -0.187287 | HC        | 36     | -0.024930 |        |
|                                   | H5                 | 175    | 0.218411  | CT2       | 21     | -0.181556 |        |
|                                   | H4                 | 173    | 0.212914  | HC        | 168    | 0.045050  |        |
|                                   | [OAc] <sup>-</sup> | O2     | 505       | -0.865    | H1     | 518       | 0.014  |
|                                   |                    | C      | 3         | 0.964     | O2     | 511       | -0.873 |
| CT                                |                    | 23     | -0.269    |           |        |           |        |

**Table S4** Force field parameters for [C<sub>n</sub>mim][OAc] (*n* = 4, 6) ILs used in this work.

|                | Bonds                                                  |                  |           |                                                   |                                                        |                |          |
|----------------|--------------------------------------------------------|------------------|-----------|---------------------------------------------------|--------------------------------------------------------|----------------|----------|
|                | $K_r$<br>(kJ·mol <sup>-1</sup> ·Å <sup>-2</sup> )      | $r_0$ (Å)        |           | $K_r$<br>(kJ·mol <sup>-1</sup> ·Å <sup>-2</sup> ) | $r_0$ (Å)                                              |                |          |
| CT-CT          | 1297                                                   | 1.53             | CT-CT2    | 1297                                              | 1.53                                                   |                |          |
| CT-CN2         | 1297                                                   | 1.53             | CN3-HC    | 1423                                              | 1.08                                                   |                |          |
| CT-HC          | 1423                                                   | 1.08             | CT2-HC    | 1423                                              | 1.08                                                   |                |          |
| CN3-NA         | 1172                                                   | 1.47             | CN2-N1    | 1423                                              | 1.08                                                   |                |          |
| CW-H4          | 1611                                                   | 1.07             | CR-H5     | 1590                                              | 1.07                                                   |                |          |
| CR-NA          | 1674                                                   | 1.33             | CW-NA     | 1506                                              | 1.38                                                   |                |          |
| CN2-NA         | 1172                                                   | 1.47             | CW-CW     | 1715                                              | 1.34                                                   |                |          |
| CT-C           | 1326                                                   | 1.53             | C-O2      | 2092                                              | 1.25                                                   |                |          |
| CT-H1          | 1423                                                   | 1.09             |           |                                                   |                                                        |                |          |
| Angles         |                                                        |                  |           |                                                   |                                                        |                |          |
|                | $K_r$<br>(kJ·mol <sup>-1</sup> ·Å <sup>-2</sup> )      | $\theta_0$ (deg) |           | $K_r$<br>(kJ·mol <sup>-1</sup> ·Å <sup>-2</sup> ) | $\theta_0$ (deg)                                       |                |          |
| CT-CN2-H1      | 159                                                    | 109.5            | CT-CT-HC  | 155                                               | 109.5                                                  |                |          |
| CT-CT2-HC      | 155                                                    | 109.5            | CN2-CT-HC | 155                                               | 109.5                                                  |                |          |
| CT2-CT-HC      | 155                                                    | 109.5            | CT-CT-CT2 | 167                                               | 109.5                                                  |                |          |
| CT-CT-CT       | 167                                                    | 109.5            | CT-CT-CN2 | 167                                               | 109.5                                                  |                |          |
| HC-CT-HC       | 142                                                    | 109.5            | HC-CT2-HC | 142                                               | 109.5                                                  |                |          |
| HC-CN3-NA      | 230                                                    | 109.5            | CT-CN2-NA | 293                                               | 112.2                                                  |                |          |
| H1-CN2-H1      | 146                                                    | 109.5            | HC-CN3-HC | 142                                               | 109.5                                                  |                |          |
| H1-CN2-NA      | 230                                                    | 109.5            | CW-NA-CN3 | 209                                               | 125.7                                                  |                |          |
| CW-NA-CN2      | 209                                                    | 125.7            | CR-NA-CN3 | 209                                               | 126.3                                                  |                |          |
| CR-NA-CN2      | 209                                                    | 126.3            | CW-CW-NA  | 502                                               | 107.0                                                  |                |          |
| CR-NA-CW       | 502                                                    | 108              | NA-CR-NA  | 502                                               | 109.9                                                  |                |          |
| H4-CW-NA       | 126                                                    | 122.1            | H5-CR-NA  | 126                                               | 125.7                                                  |                |          |
| CW-CW-H4       | 126                                                    | 130.7            |           |                                                   |                                                        |                |          |
| CT-C-O2        | 335                                                    | 116.21           | O2-C-O2   | 356                                               | 124.97                                                 |                |          |
| H1-CT-C        | 243                                                    | 109.50           |           |                                                   |                                                        |                |          |
| Proper Torsion |                                                        |                  |           |                                                   |                                                        |                |          |
|                | $K_\psi$<br>(kJ·mol <sup>-1</sup> ·rad <sup>-2</sup> ) | $\gamma$ (deg)   | <i>n</i>  |                                                   | $K_\psi$<br>(kJ·mol <sup>-1</sup> ·rad <sup>-2</sup> ) | $\gamma$ (deg) | <i>n</i> |
| NA-CR-NA-CW    | 50.21                                                  | 180              | 2         | NA-CR-NA-CN3                                      | 8.37                                                   | 180            | 2        |
| NA-CR-NA-CN2   | 8.37                                                   | 180              | 2         | H5-CR-NA-CW                                       | 6.28                                                   | 180            | 2        |
| H5-CR-NA-CN3   | 6.28                                                   | 180              | 2         | H5-CR-NA-CN2                                      | 6.28                                                   | 180            | 2        |
| CW-CW-NA-CN3   | 8.37                                                   | 180              | 2         | H4-CW-NA-CN3                                      | 6.28                                                   | 180            | 2        |
| CW-CW-NA-CR    | 50.21                                                  | 180              | 2         | CW-CW-NA-CN2                                      | 8.37                                                   | 180            | 2        |
| H4-CW-NA-CR    | 8.37                                                   | 180              | 2         | H4-CW-NA-CN2                                      | 6.28                                                   | 180            | 2        |
| NA-CW-CW-H4    | 6.28                                                   | 180              | 2         | NA-CW-CW-NA                                       | 50.21                                                  | 180            | 2        |
| H4-CW-CW-H4    | 6.28                                                   | 180              | 2         | HC-CT-CT-CN2                                      | 0.67                                                   | 0              | 3        |
| HC-CN2-CT-CT   | 0.67                                                   | 0                | 3         | HC-CN3-NA-CR                                      | 0.69                                                   | 0              | 3        |
| H1-CN2-CT-CT   | 0.67                                                   | 0                | 3         | CT2-CT-CT-CN2                                     | 4.39                                                   | 0              | 3        |
| CT2-CT-CT-CT   | 1.05                                                   | 0                | 3         | CN2-CT-CT-CT                                      | 1.05                                                   | 0              | 3        |

|                  |                                                        |                          |     |              |                                                        |                |     |
|------------------|--------------------------------------------------------|--------------------------|-----|--------------|--------------------------------------------------------|----------------|-----|
| CT-CT-CT-CT      | 1.05                                                   | 0                        | 3   | HC-CT-CT-CT  | 0.67                                                   | 0              | 3   |
| HC-CT-CT-CT2     | 0.67                                                   | 0                        | 3   | NA-CN2-CT-CT | 4.39                                                   | 0              | 3   |
| NA-CN2-CT-HC     | 0.67                                                   | 0                        | 3   | H1-CN2-CT-HC | 0.63                                                   | 0              | 3   |
| HC-CN3-NA-CW     | 1.00                                                   | 0                        | 3   | H1-CN3-NA-CR | 0.69                                                   | 0              | 3   |
| H1-CN2-NA-CW     | 1.00                                                   | 0                        | 3   | H1-CN2-NA-CR | 0.69                                                   | 0              | 3   |
| CT-CN2-NA-CW     | -0.74                                                  | 0                        | 1   | CT-CN2-NA-CR | -0.99                                                  | 0              | 1   |
| HC-CT-CT-HC      | 0.63                                                   | 0                        | 3   | HC-CN3-CT-HC | 0.63                                                   | 0              | 3   |
| HC-CN3-CT-CT     | 0.67                                                   | 0                        | 3   | H1-CT-C-O2   | 0                                                      | 0              | 2   |
| Improper Torsion |                                                        |                          |     |              |                                                        |                |     |
|                  | $K_\psi$<br>(kJ·mol <sup>-1</sup> ·rad <sup>-2</sup> ) | $\gamma$ (deg)           | $n$ |              | $K_\psi$<br>(kJ·mol <sup>-1</sup> ·rad <sup>-2</sup> ) | $\gamma$ (deg) | $n$ |
| NA-NA-CR-H5      | 4.60                                                   | 180                      | 2   | CW-NA-CW-H4  | 4.60                                                   | 180            | 2   |
| CR-CW-NA-CN3     | 8.37                                                   | 180                      | 2   | CR-CW-NA-CN2 | 8.37                                                   | 180            | 2   |
| CT-O2-C-O2       | 43.93                                                  | 180                      | 2   |              |                                                        |                |     |
| Van der Waals    |                                                        |                          |     |              |                                                        |                |     |
|                  | $r_i$ (Å)                                              | $\varepsilon_i$ (kJ/mol) |     | $r_i$ (Å)    | $\varepsilon_i$ (kJ/mol)                               |                |     |
| CR               | 1.908                                                  | 0.3598                   |     | NA           | 1.824                                                  | 0.7113         |     |
| CW               | 1.908                                                  | 0.3598                   |     | H4           | 1.409                                                  | 0.0628         |     |
| H5               | 1.359                                                  | 0.0628                   |     | CT           | 1.908                                                  | 0.4561         |     |
| CN3              | 1.907                                                  | 0.7908                   |     | CN2          | 1.911                                                  | 0.5941         |     |
| CT2              | 1.973                                                  | 0.5565                   |     | H1           | 1.387                                                  | 0.0669         |     |
| HC               | 1.487                                                  | 0.0669                   |     | C            | 1.908                                                  | 0.3598         |     |
| O2               | 1.661                                                  | 0.8786                   |     |              |                                                        |                |     |

**Table S5** Heat of vaporization for the liquid-phase [C<sub>n</sub>mim][OAc] ( $n = 4, 6$ ) ILs system simulated in this work and available experiments.

|                           | $U_{\text{inter}}/\text{kJ}\cdot\text{mol}^{-1}$ | $U_{\text{ionpair}}/\text{kJ}\cdot\text{mol}^{-1}$ | $\Delta^{\text{E}}_1 H^{\text{O}}_{\text{m}}/\text{kJ}\cdot\text{mol}^{-1}$ | $\Delta^{\text{E}}_1 H^{\text{O}}_{\text{m}}(\text{exp.})/\text{kJ}\cdot\text{mol}^{-1}$ |
|---------------------------|--------------------------------------------------|----------------------------------------------------|-----------------------------------------------------------------------------|------------------------------------------------------------------------------------------|
| [C <sub>4</sub> mim][OAc] | 526.3331                                         | 394.5340                                           | 134.29                                                                      | 127.8 ± 4.3                                                                              |
| [C <sub>6</sub> mim][OAc] | 534.8122                                         | 394.4713                                           | 142.84                                                                      | 133.1 ± 4.2                                                                              |
